# Supplementary material for: Lung ultrasound for early diagnosis and severity assessment of pneumonia in patients with coronavirus disease 2019
Source: PubMed Central journal article supplement — Korean J Intern Med. 2020 Jul 1;35(4):771–81. doi: 10.3904/kjim.2020.180 (PMC7373970; doi:10.3904/kjim.2020.180), 2020-07-01
Supplement: kjim-2020-180-suppl2.pdf [file kjim-2020-180-suppl2.pdf]

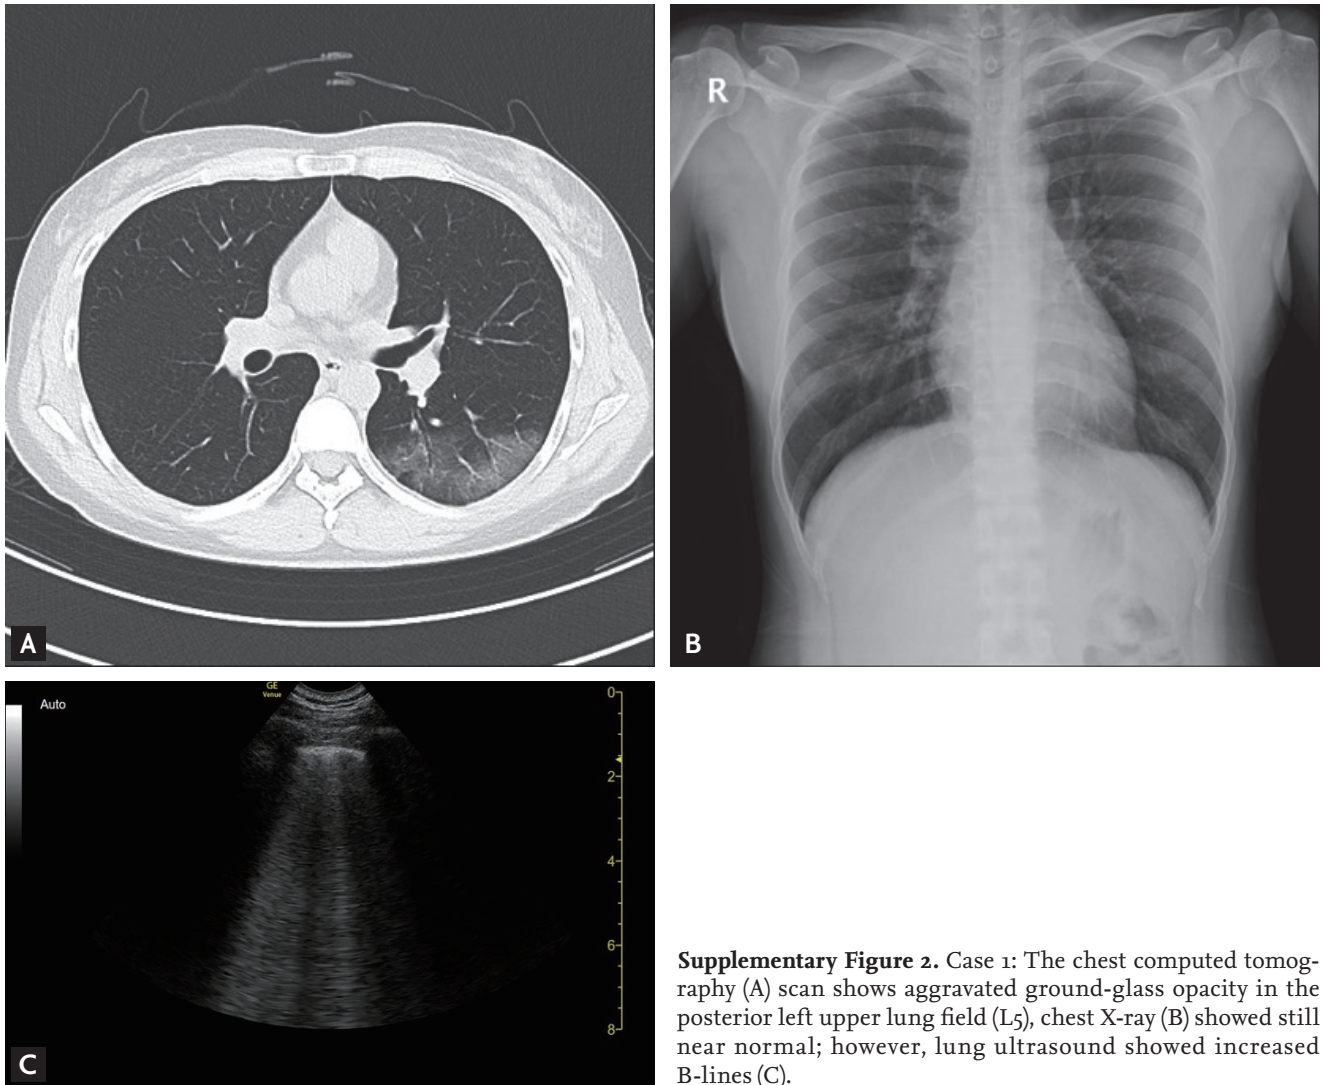

**Supplementary Figure 2.** Case 1: The chest computed tomography (A) scan shows aggravated ground-glass opacity in the posterior left upper lung field (L5), chest X-ray (B) showed still near normal; however, lung ultrasound showed increased B-lines (C).
