# Supplementary material for: Lung ultrasound for early diagnosis and severity assessment of pneumonia in patients with coronavirus disease 2019
Source: PubMed Central journal article supplement — Korean J Intern Med. 2020 Jul 1;35(4):771–81. doi: 10.3904/kjim.2020.180 (PMC7373970; doi:10.3904/kjim.2020.180), 2020-07-01
Supplement: kjim-2020-180-suppl4.pdf [file kjim-2020-180-suppl4.pdf]

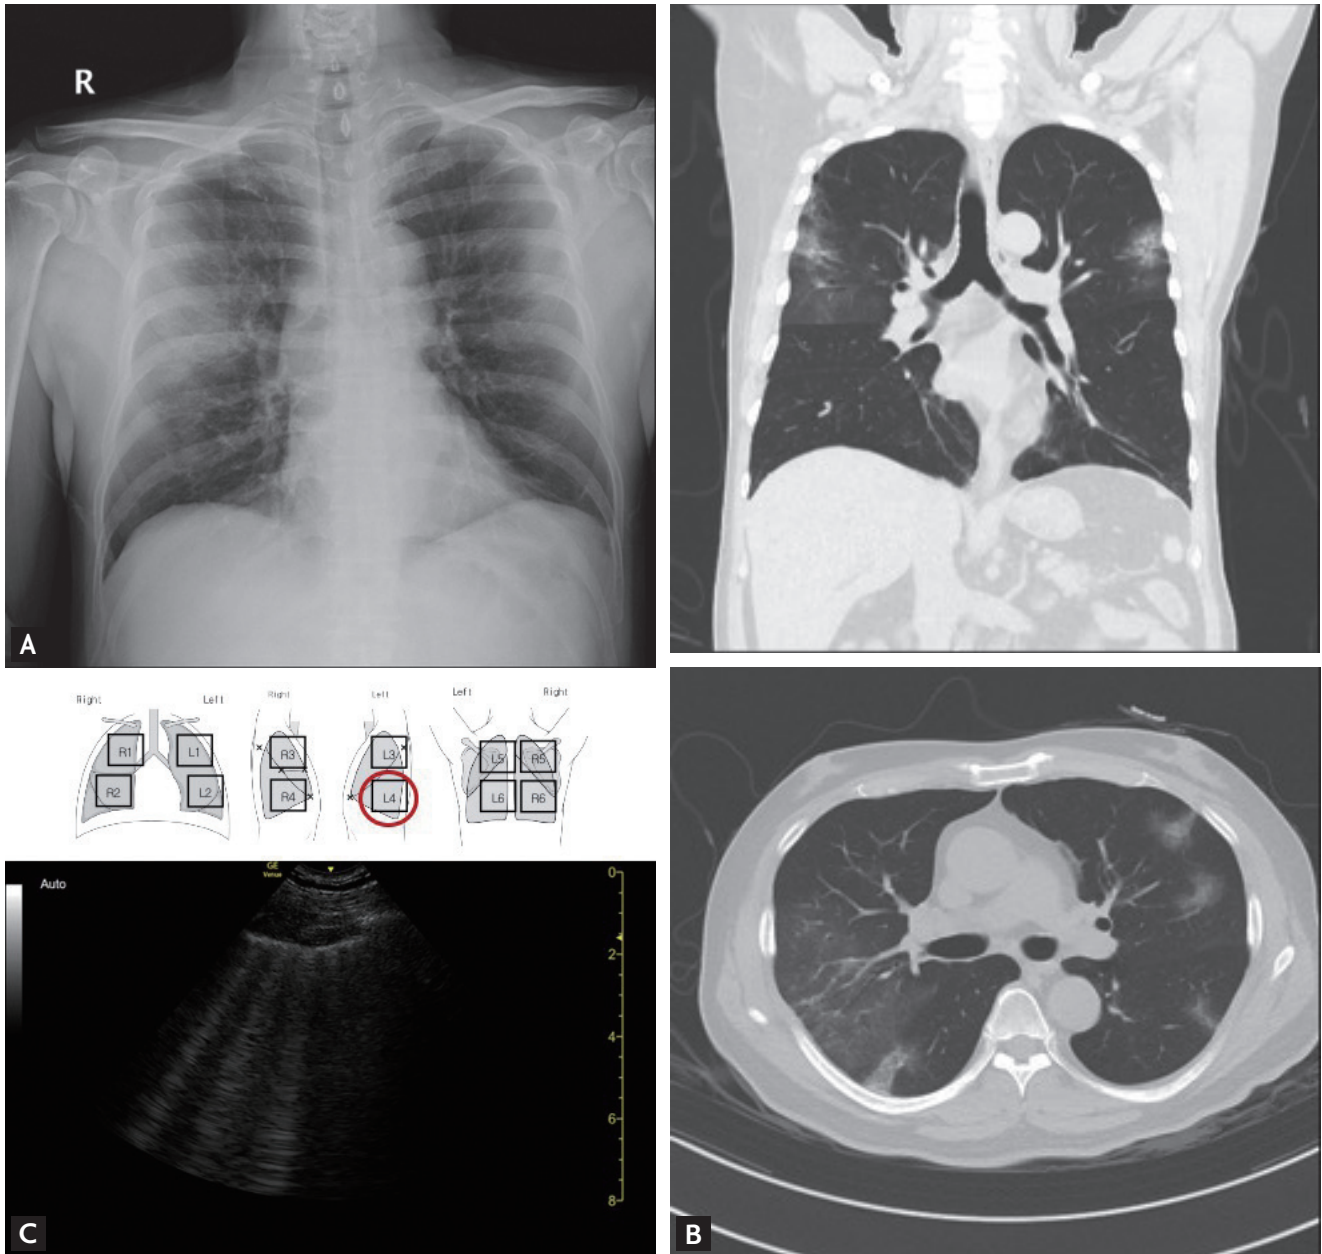

**Supplementary Figure 4.** Case 2: The chest X-ray shows subtle bilateral ground-glass opacities, which are more prominent in the right upper lung field (A), the chest computed tomography showed newly developed ground-glass opacities in the left lung fields (B); however, lung ultrasound detected B-lines in this area more earlier (C).
