# Supplementary material for: Lung ultrasound for early diagnosis and severity assessment of pneumonia in patients with coronavirus disease 2019
Source: PubMed Central journal article supplement — Korean J Intern Med. 2020 Jul 1;35(4):771–81. doi: 10.3904/kjim.2020.180 (PMC7373970; doi:10.3904/kjim.2020.180), 2020-07-01
Supplement: kjim-2020-180-suppl7.pdf [file kjim-2020-180-suppl7.pdf]

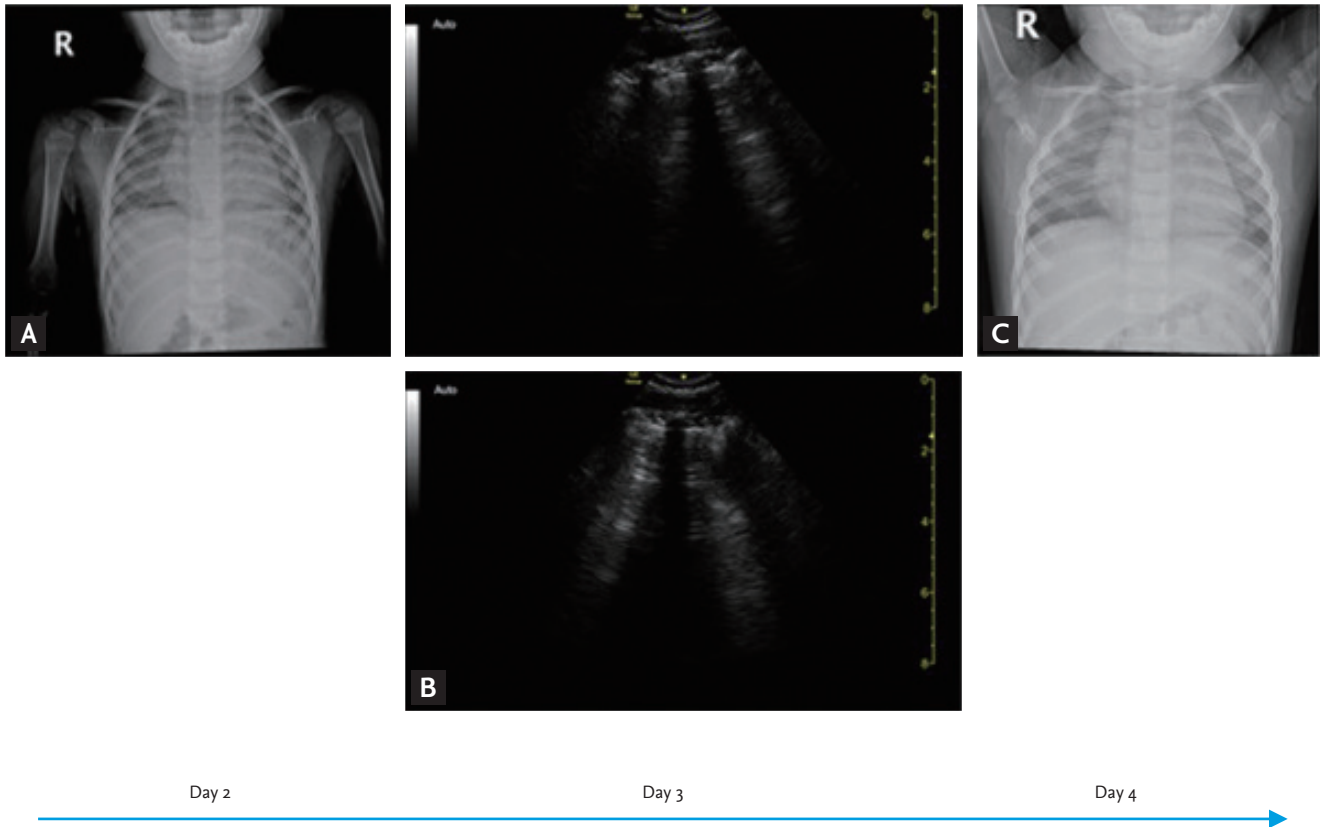

**Supplementary Figure 7.** Case 6: Initial chest X-ray (A), lung ultrasound with both A-lines (B), and follow-up chest X-ray (C) showed all normal findings.
