# Supplementary material for: Lung ultrasound for early diagnosis and severity assessment of pneumonia in patients with coronavirus disease 2019
Source: PubMed Central journal article supplement — Korean J Intern Med. 2020 Jul 1;35(4):771–81. doi: 10.3904/kjim.2020.180 (PMC7373970; doi:10.3904/kjim.2020.180), 2020-07-01
Supplement: kjim-2020-180-suppl8.pdf [file kjim-2020-180-suppl8.pdf]

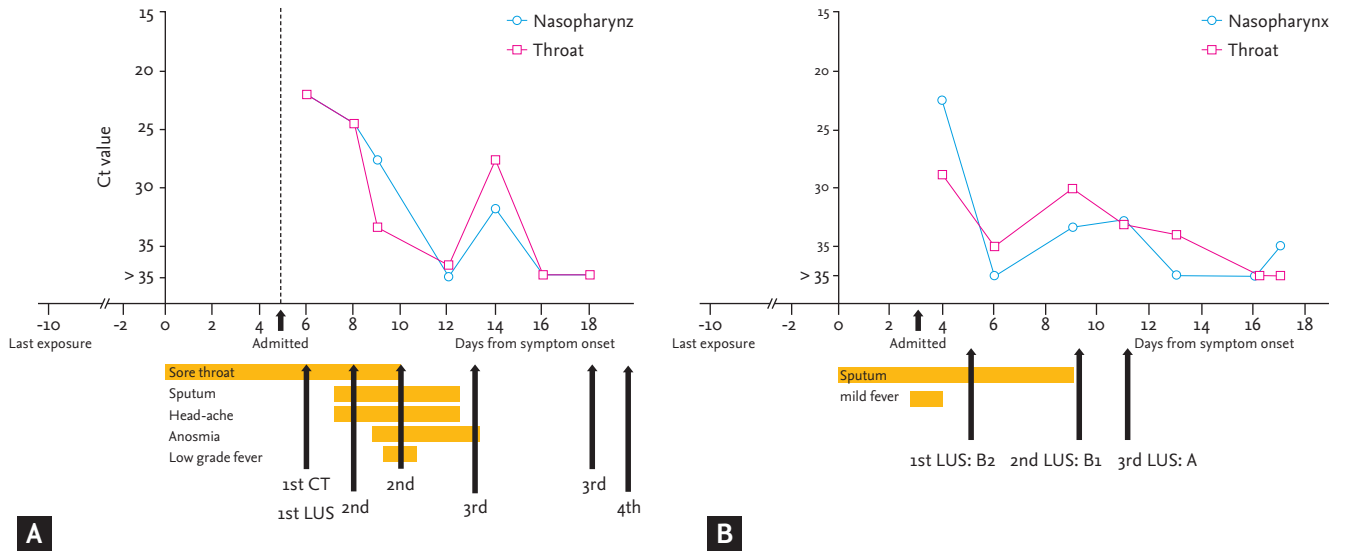

**Supplementary Figure 8.** Case 1 (A) and Case 5 (B): The temporal association between the lung ultrasound (LUS) findings, the symptoms, and severe acute respiratory syndrome coronavirus 2 reverse transcription-polymerase chain reaction cycle threshold (Ct) values for RdRp (RNA-dependent RNA polymerase) gene, according to the time since symptom onset. CT, computed tomography.
